# Supplementary material
Source: ML conference proceedings conference paper supplement (https://openreview.net/forum?id=Hddl98Iicxq)

1

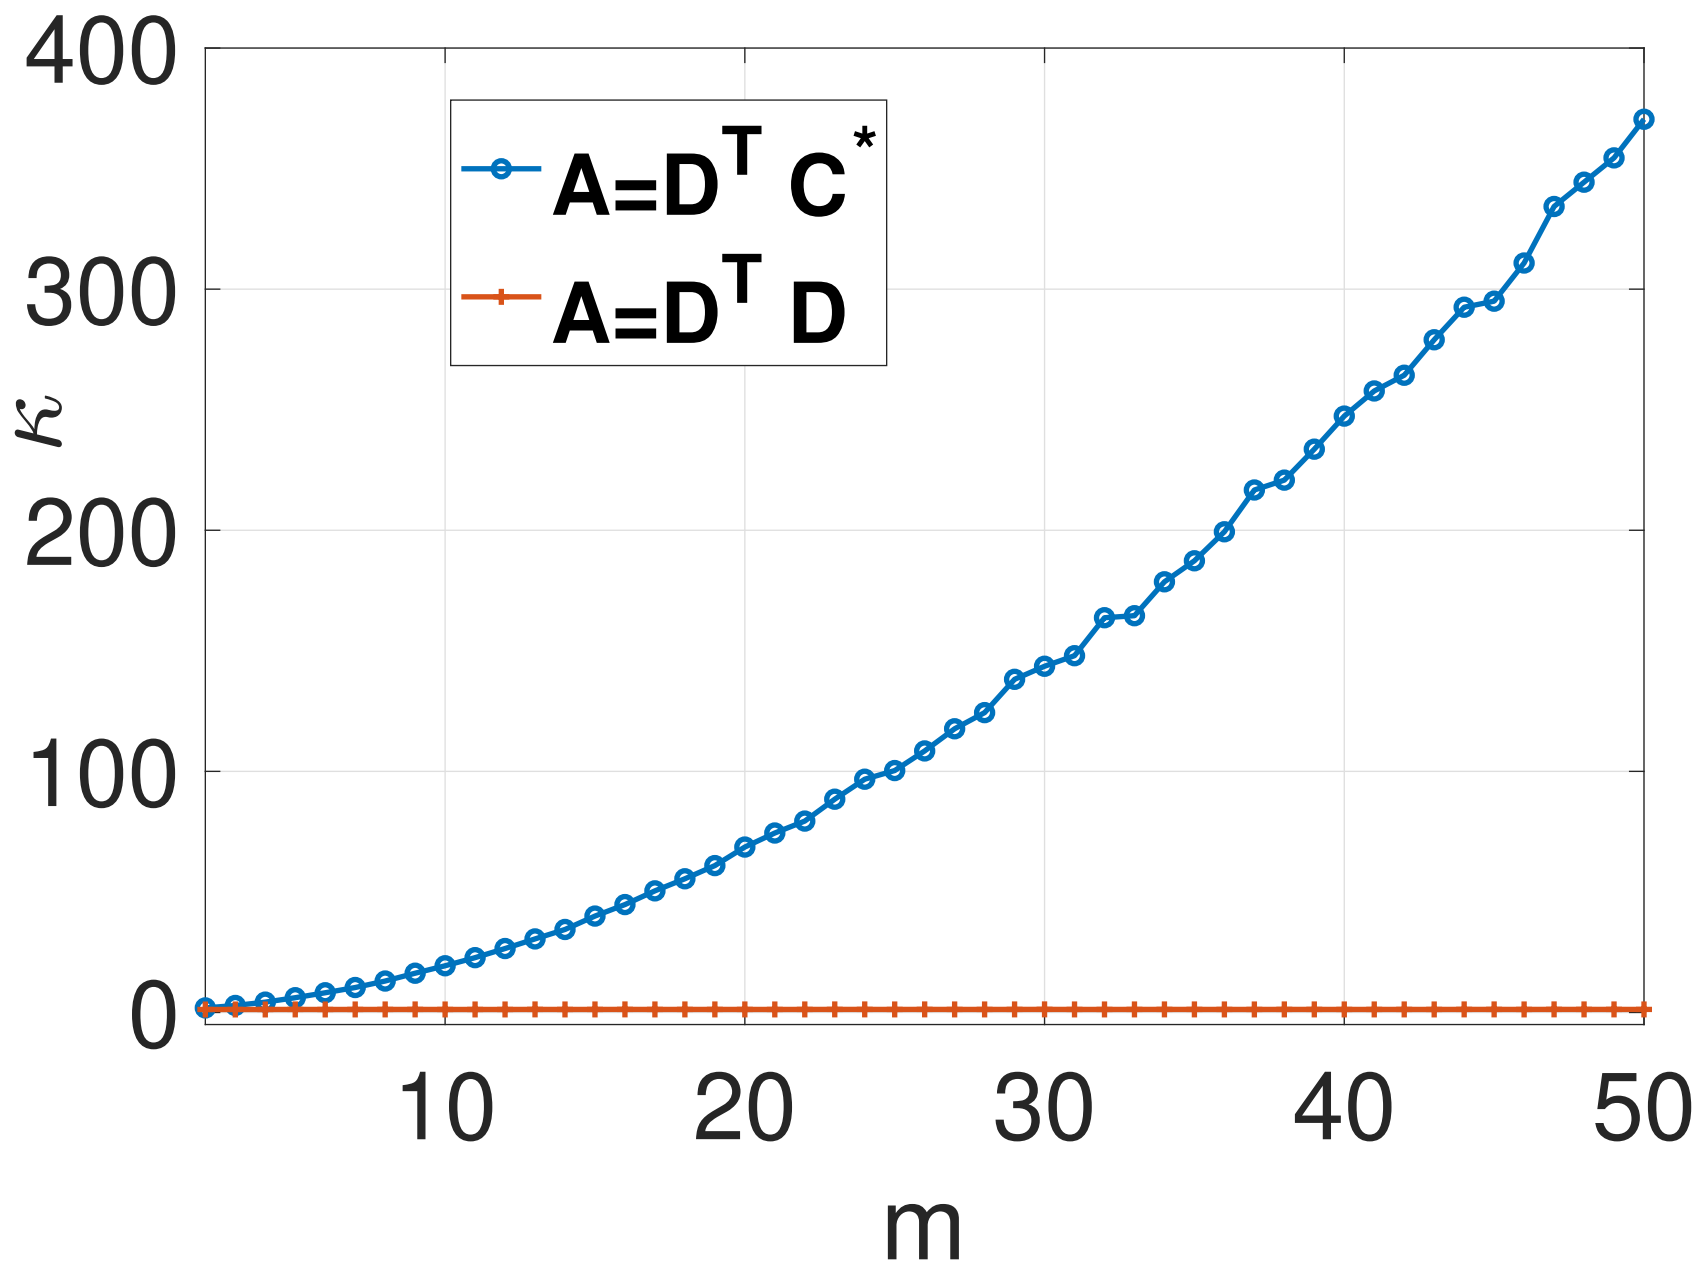

Supplement: supplementary_material [file attachment]

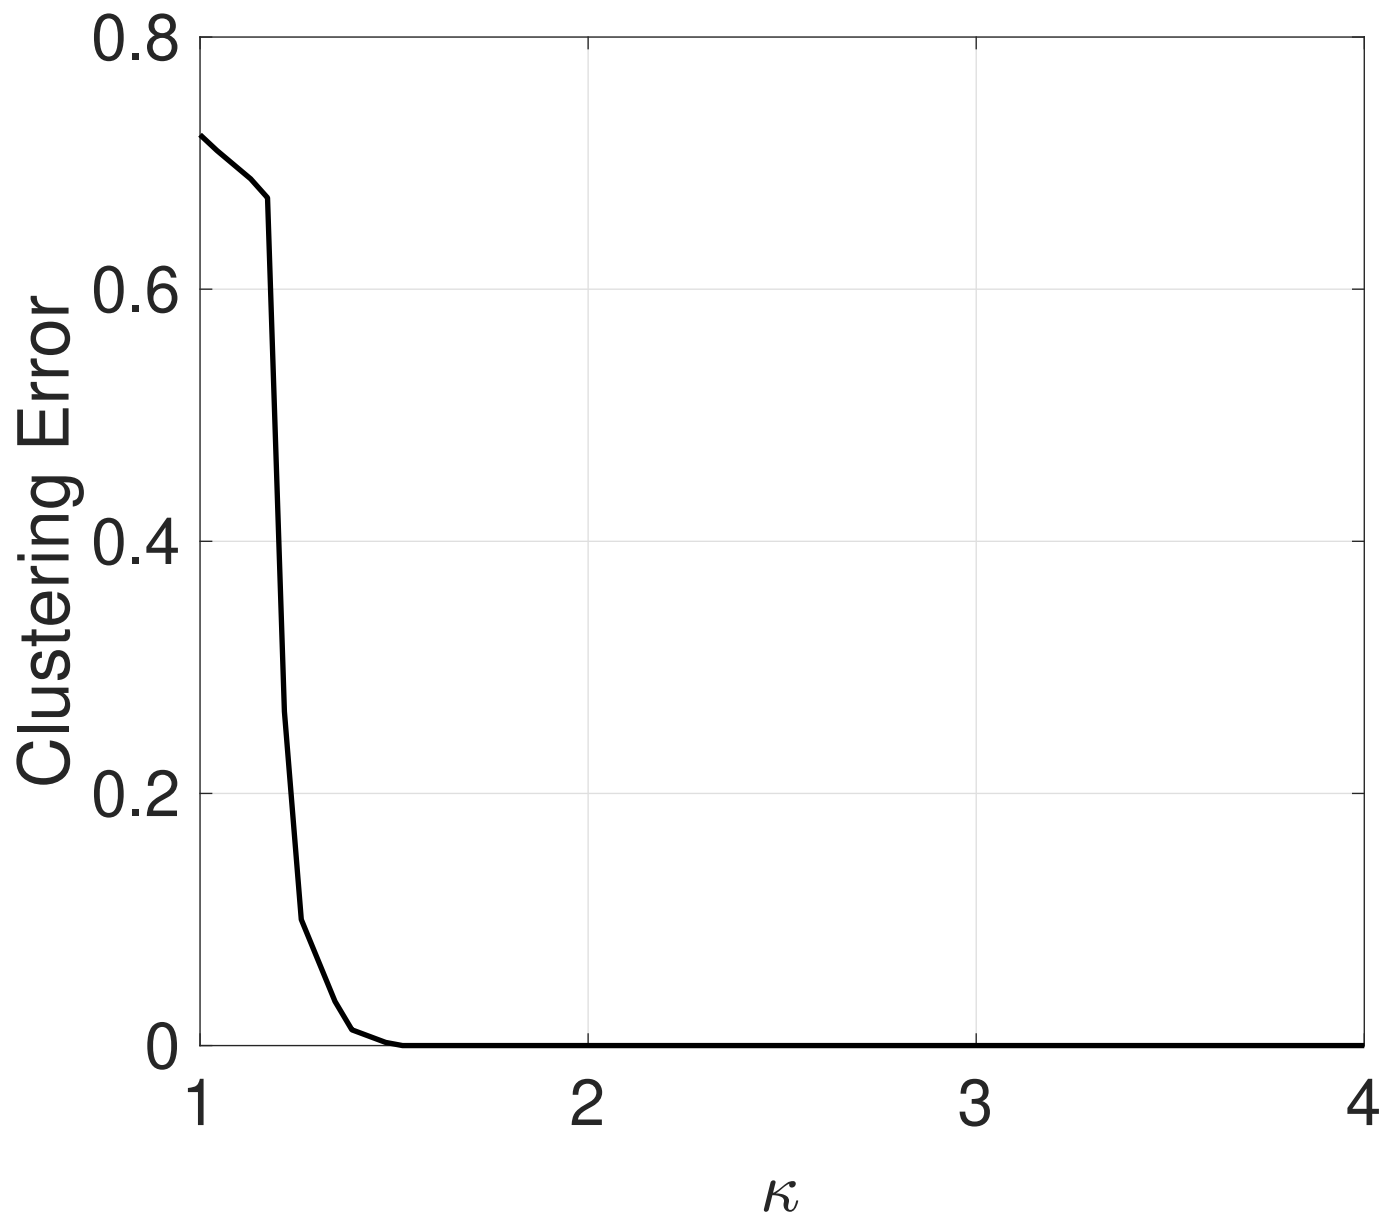

Supplement: supplementary_material [file attachment]

**$M_1 = 50$**

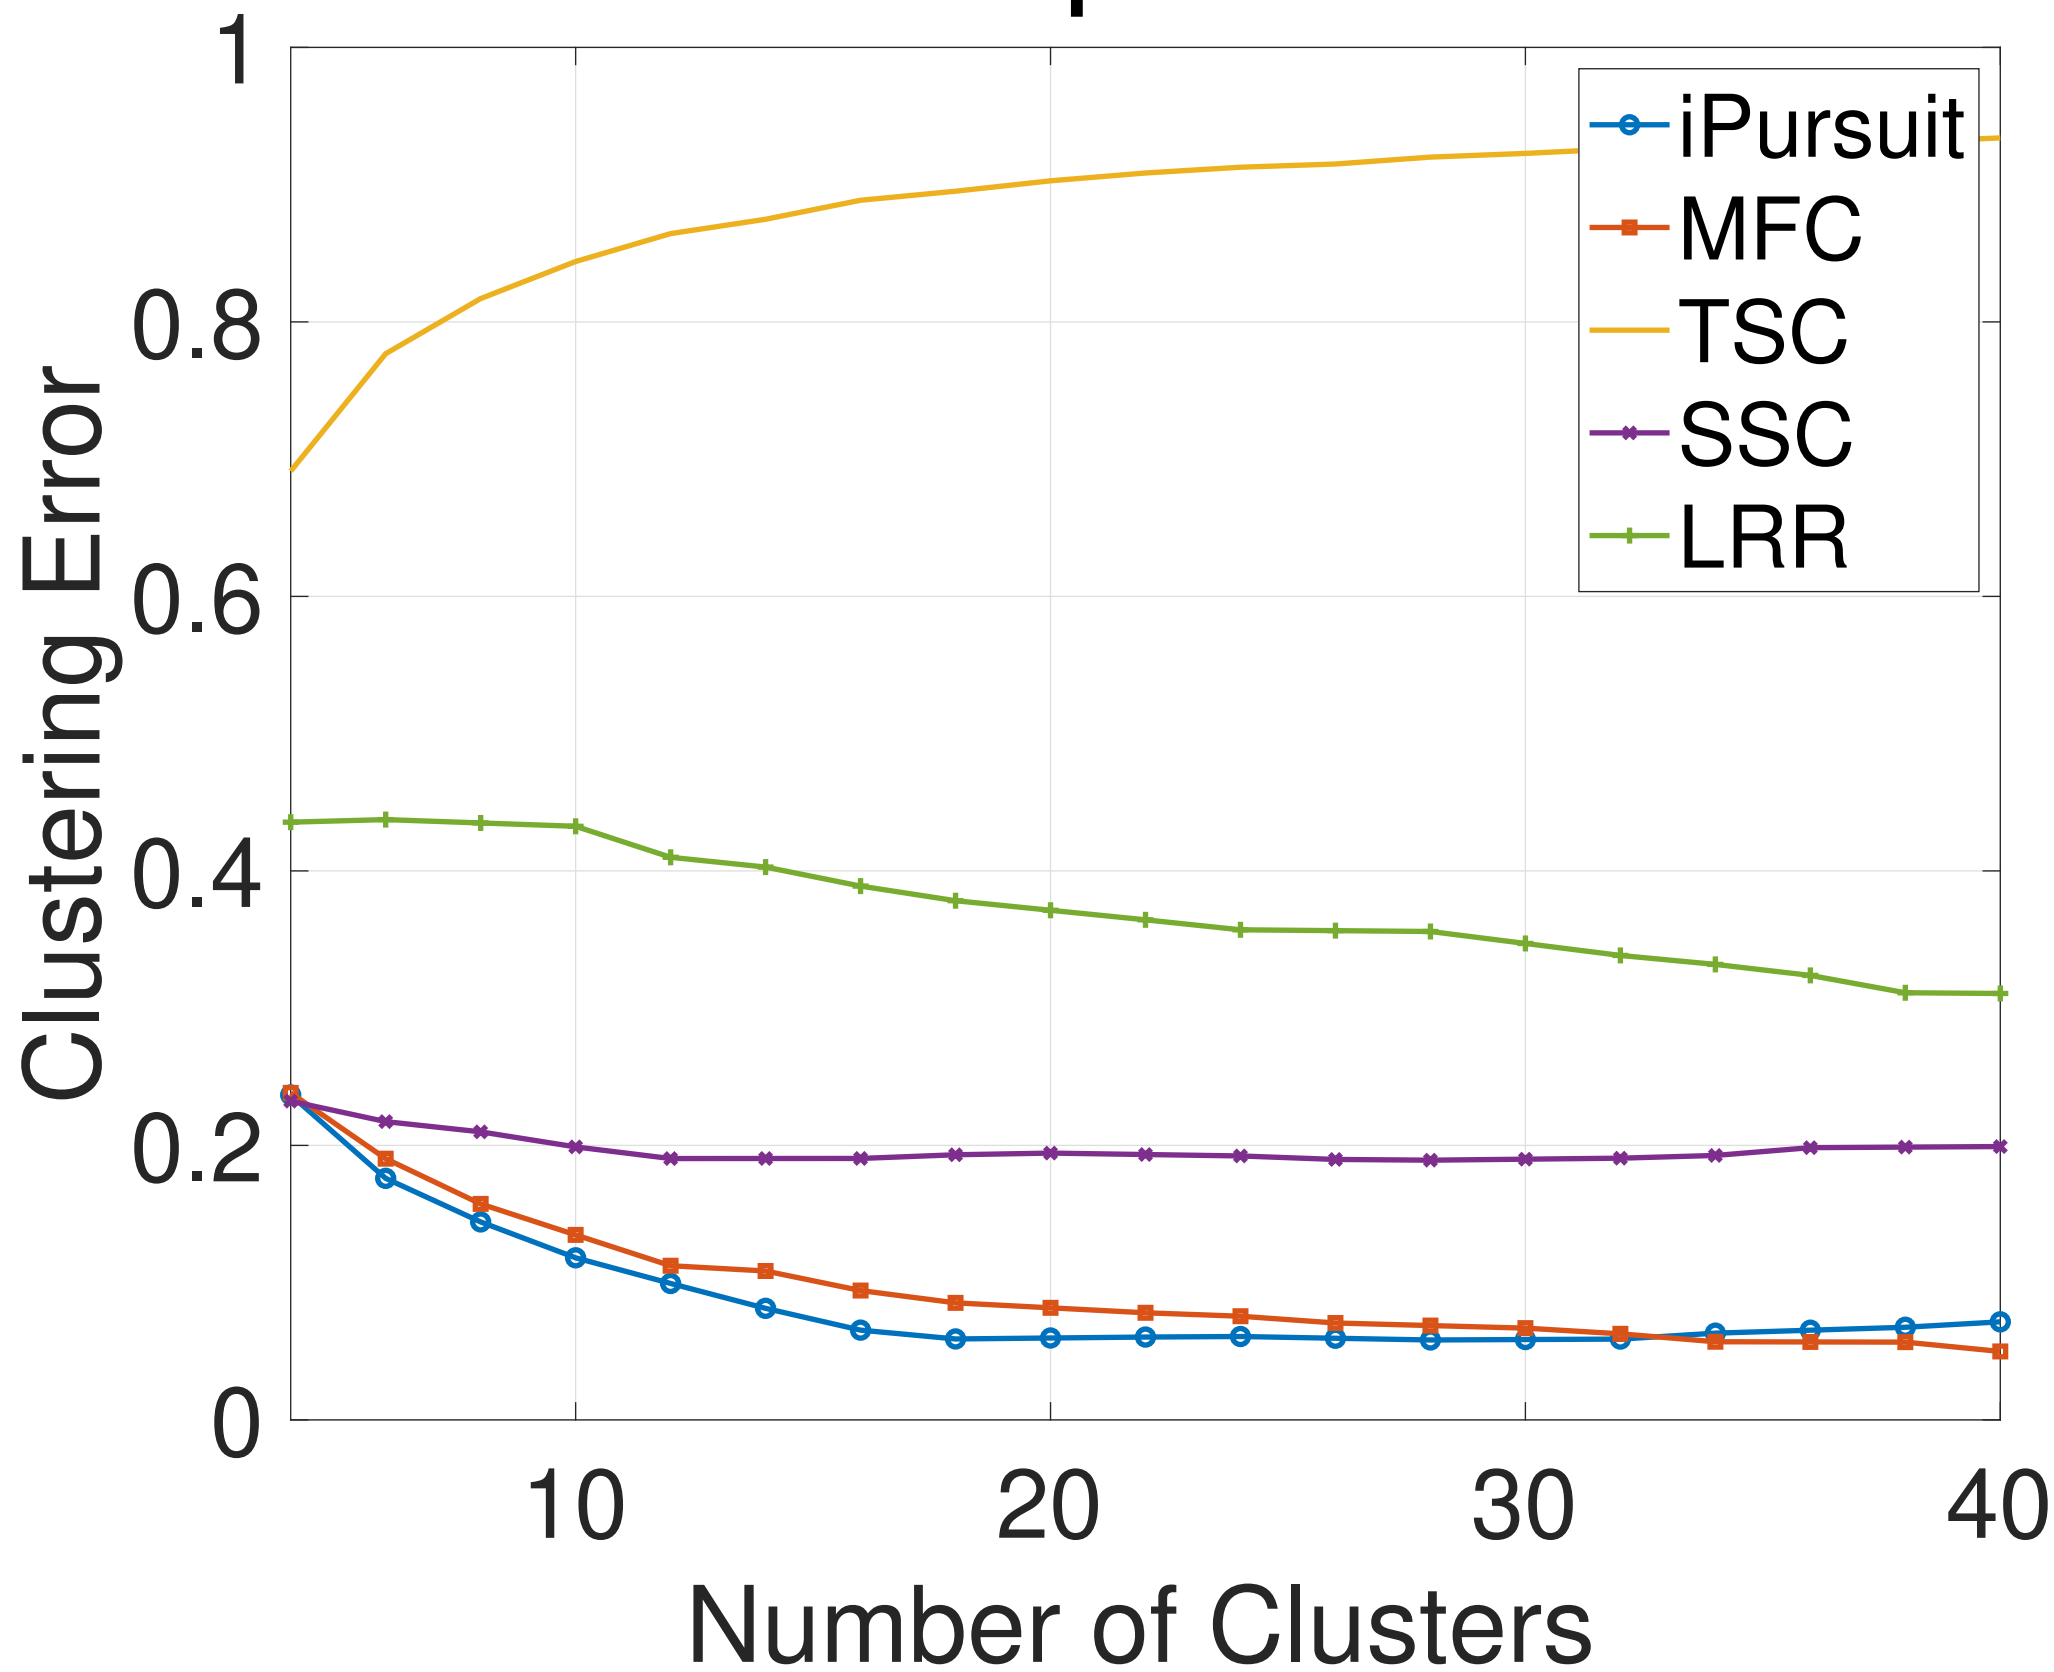

Supplement: supplementary_material [file attachment]

$$\mathbf{m} = 2, \mathbf{A} = \mathbf{D}^T \mathbf{D}$$

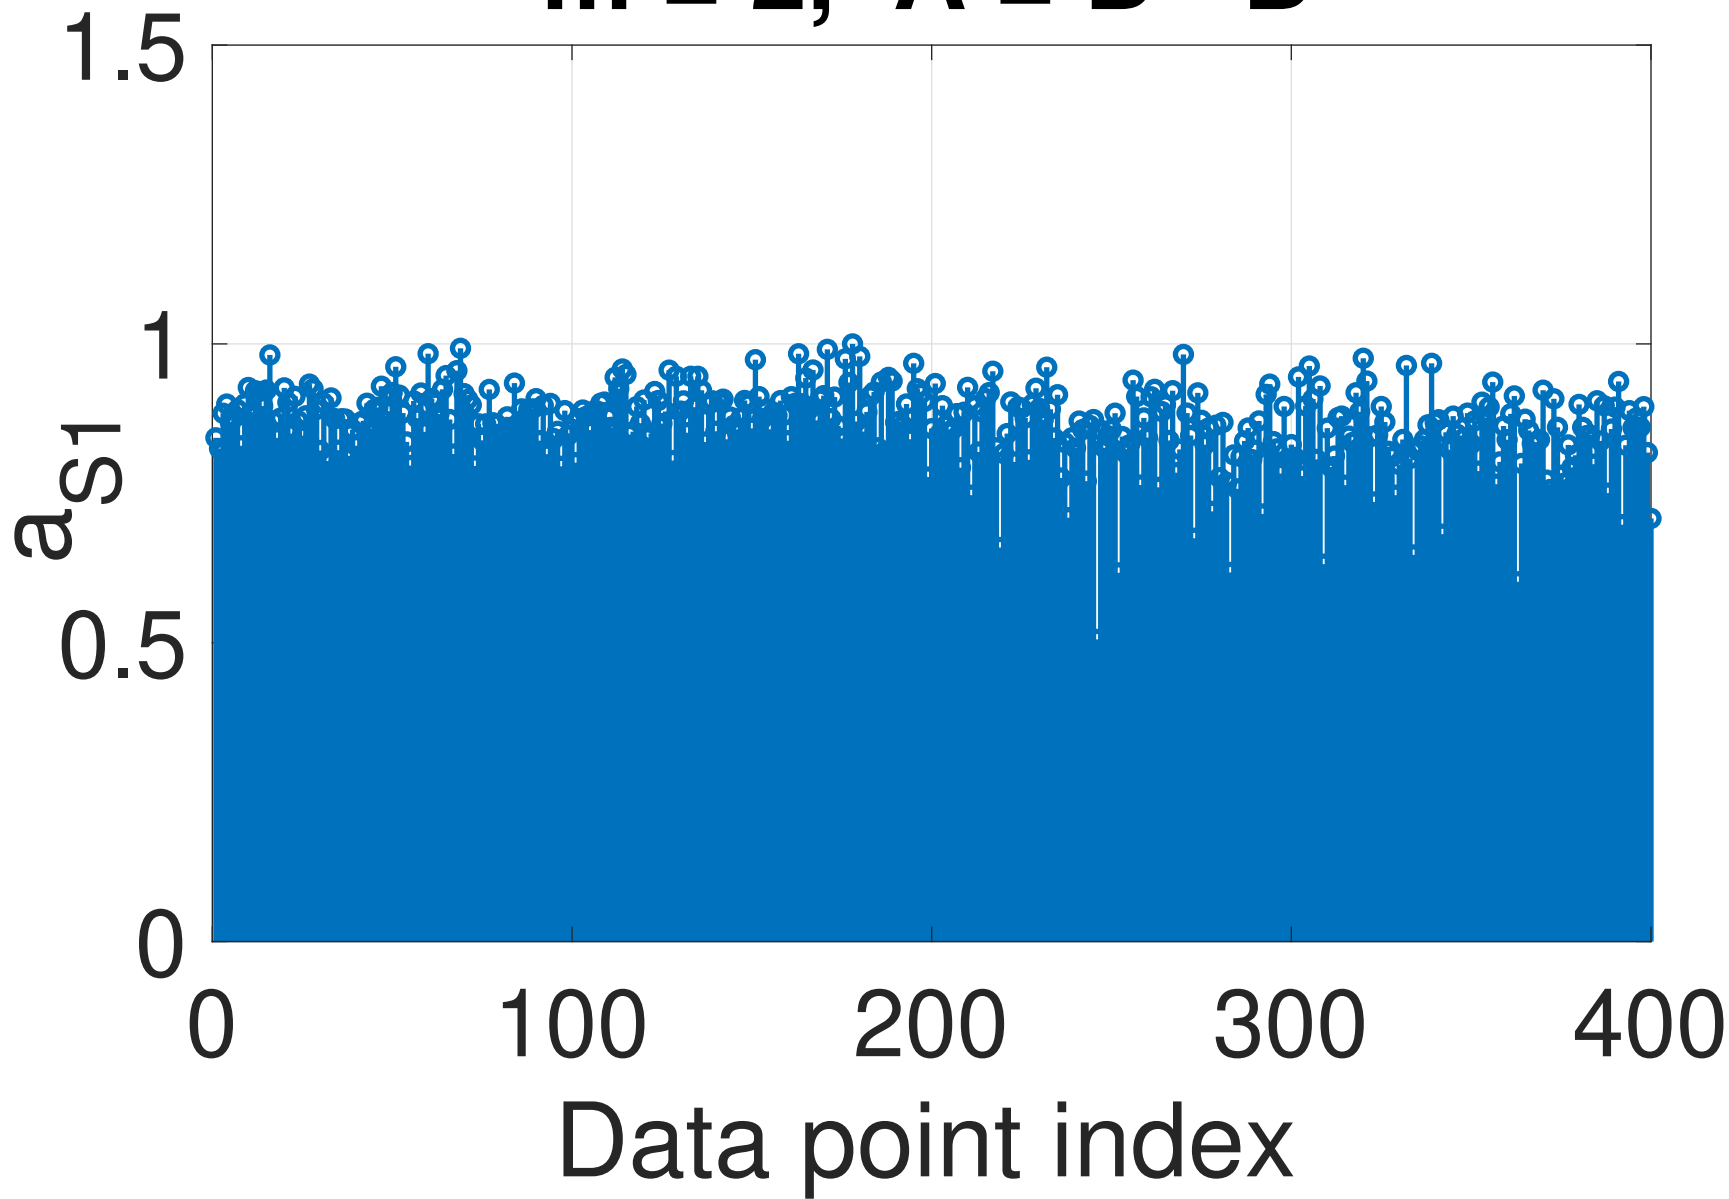

Supplement: supplementary_material [file attachment]

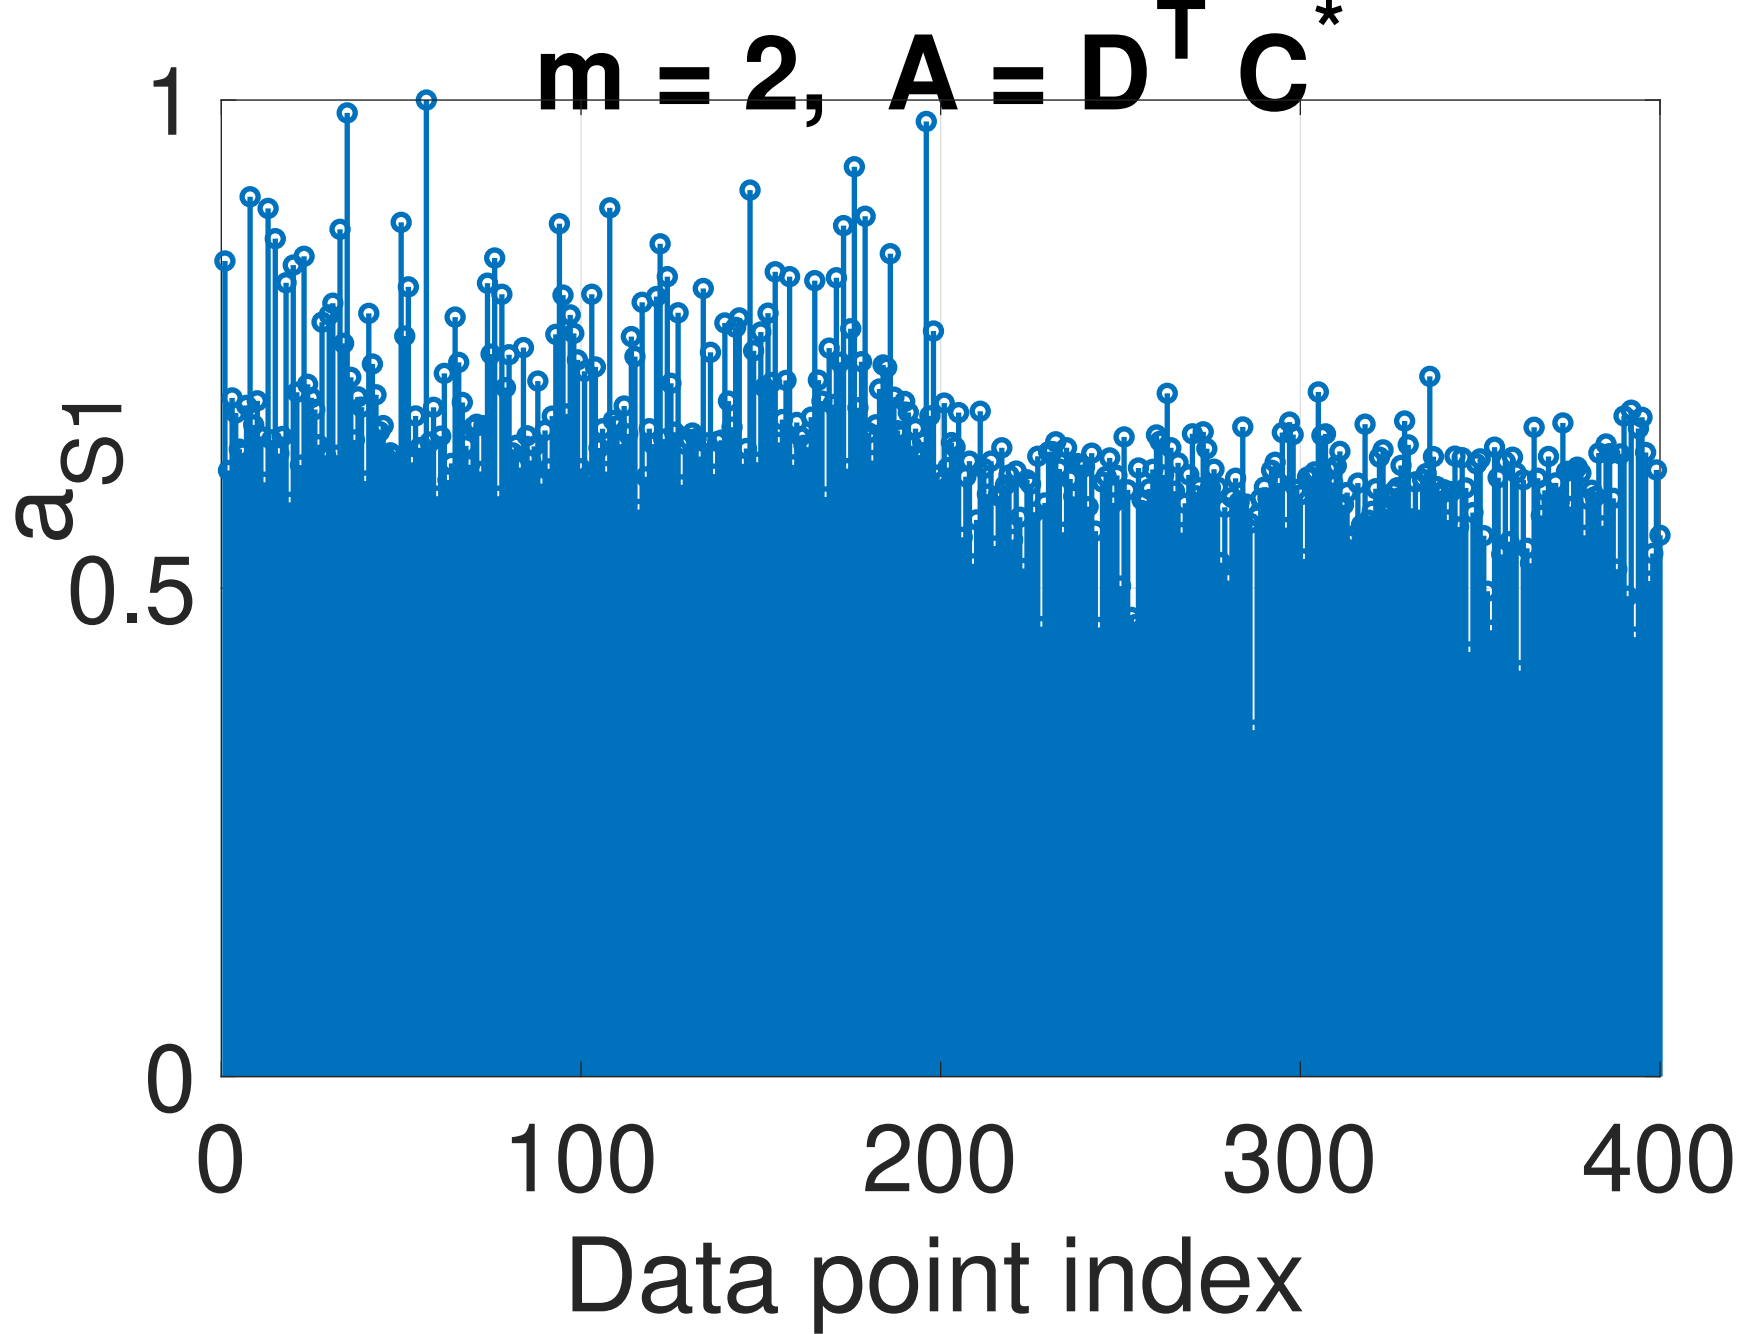

Supplement: supplementary_material [file attachment]

**$M_1 = 300$**

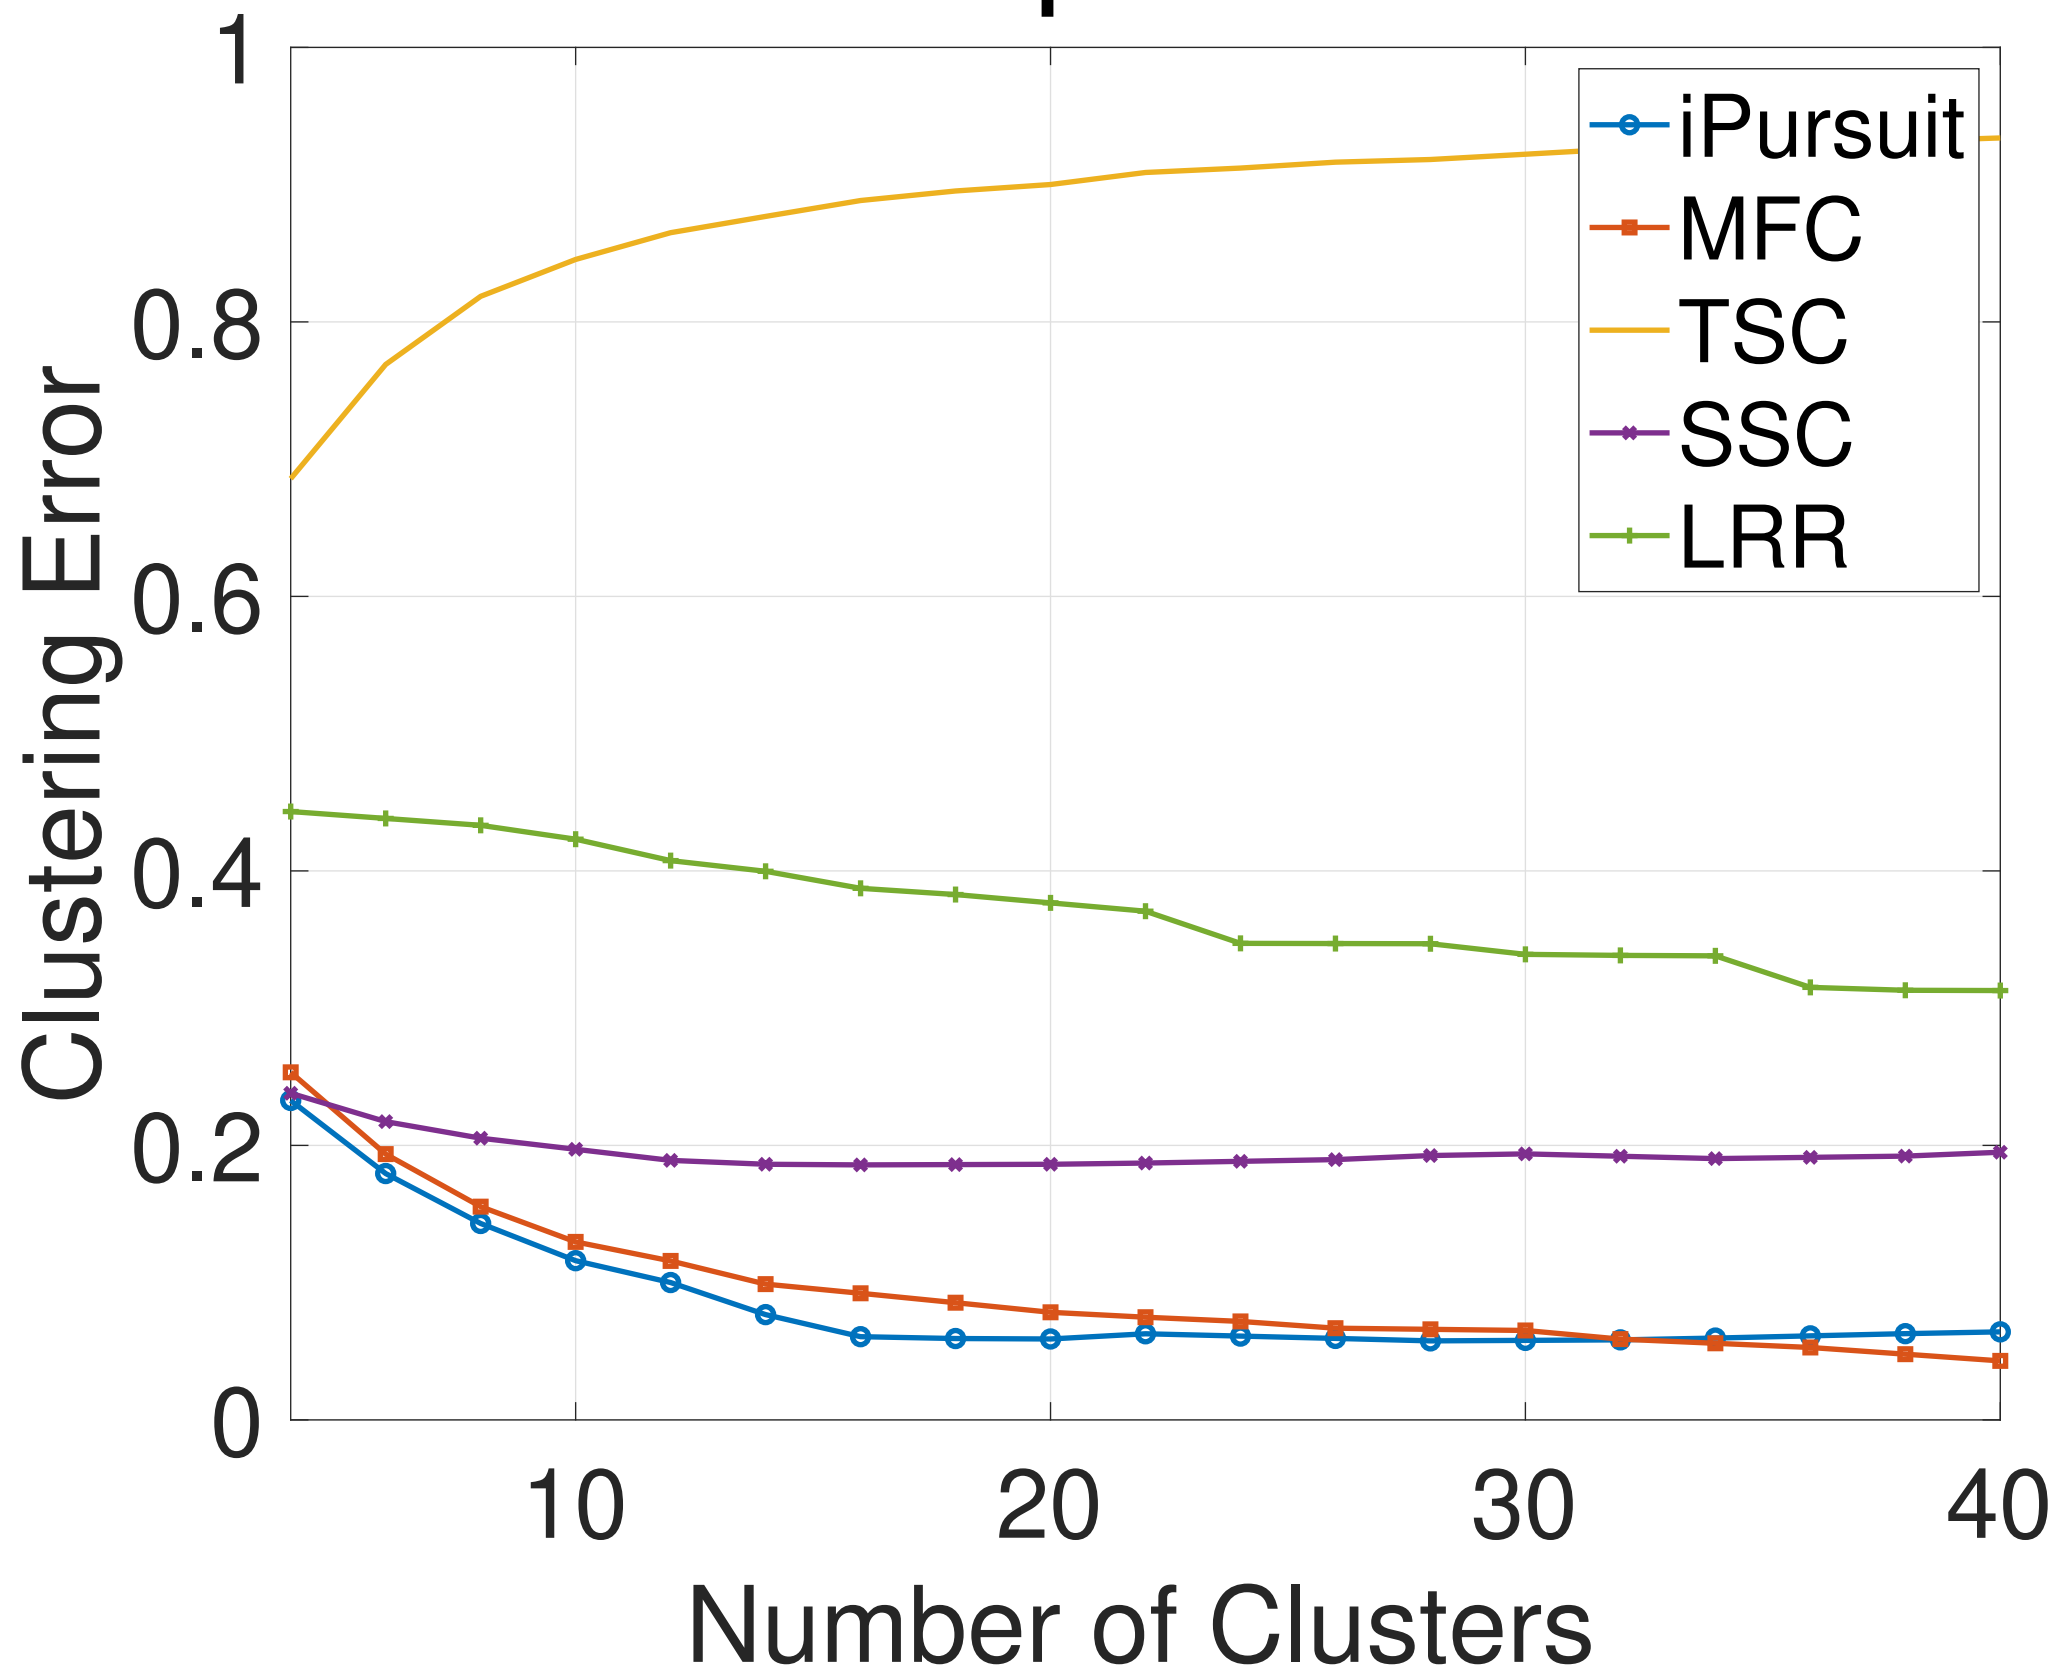

Supplement: supplementary_material [file attachment]

$$m = 10, A = D^T C^*$$

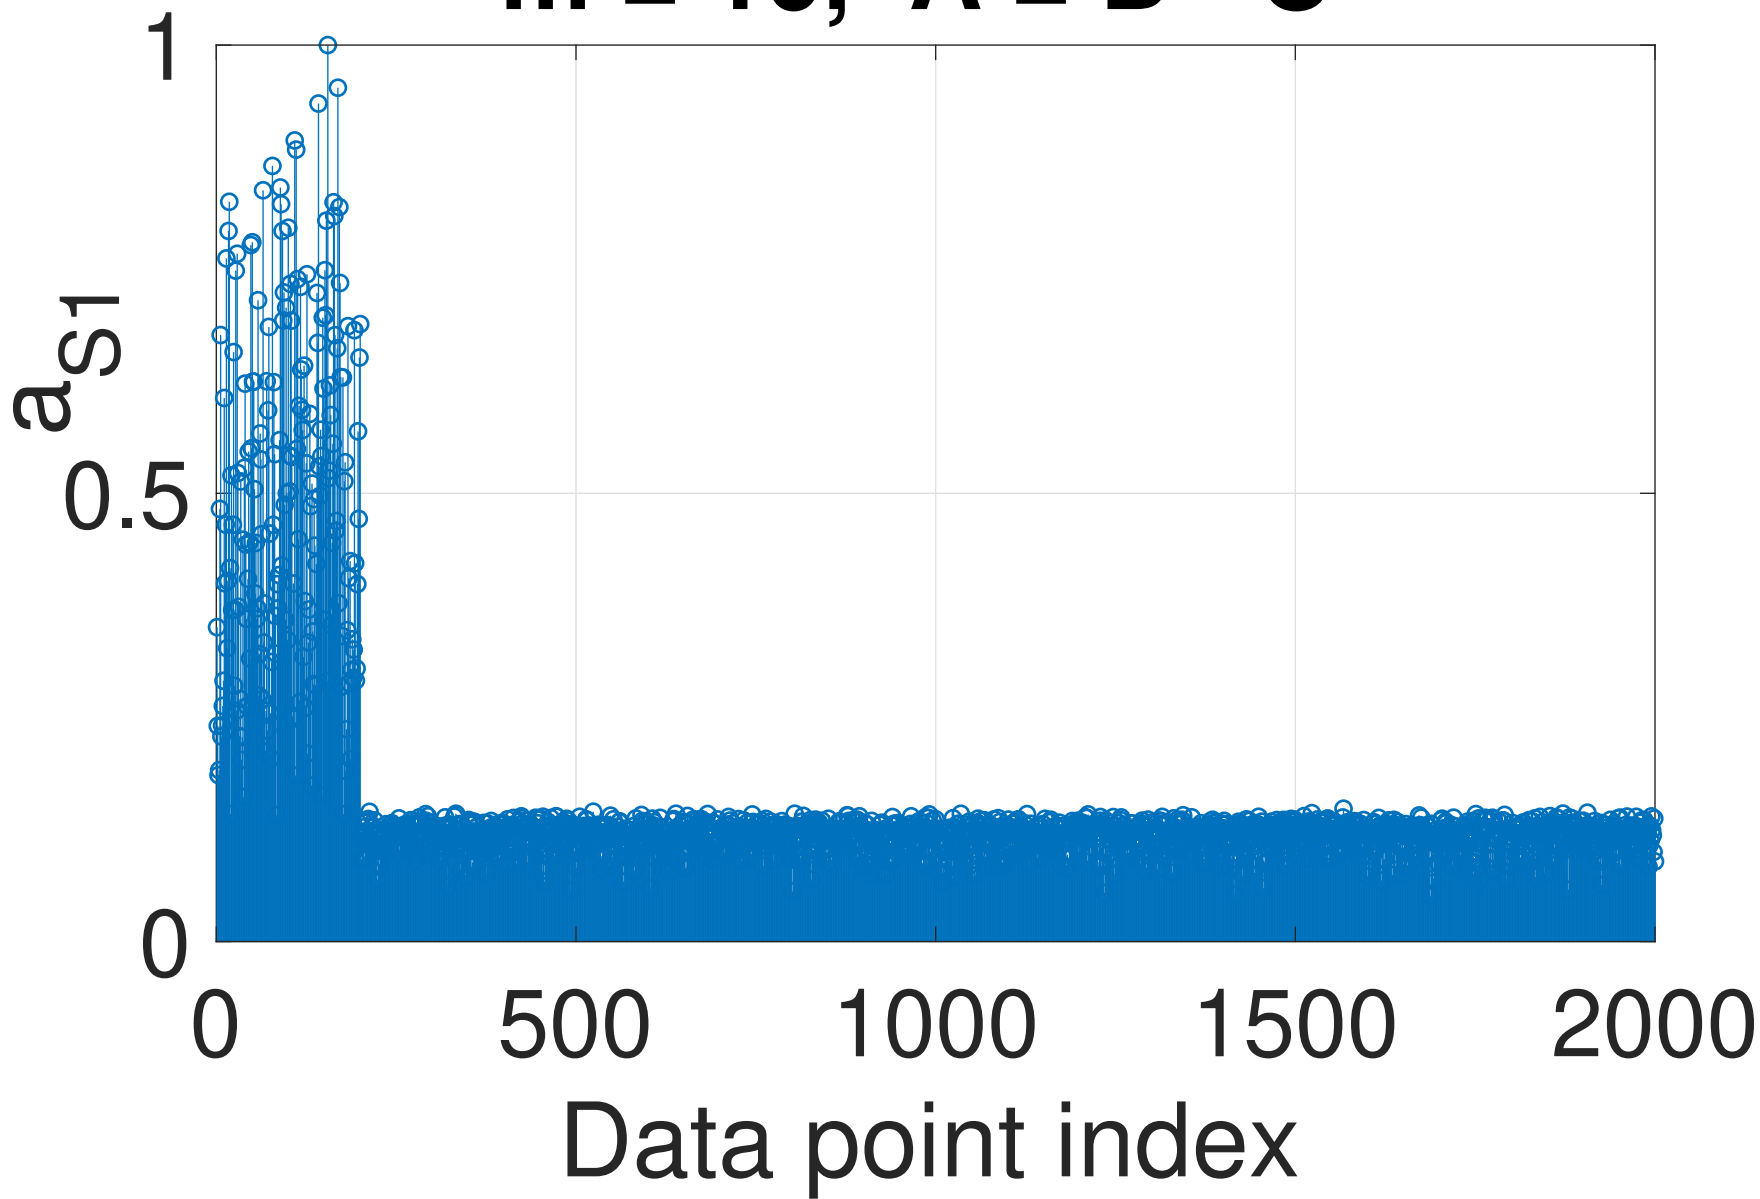

Supplement: supplementary_material [file attachment]

$$m = 10, A = D^T D$$

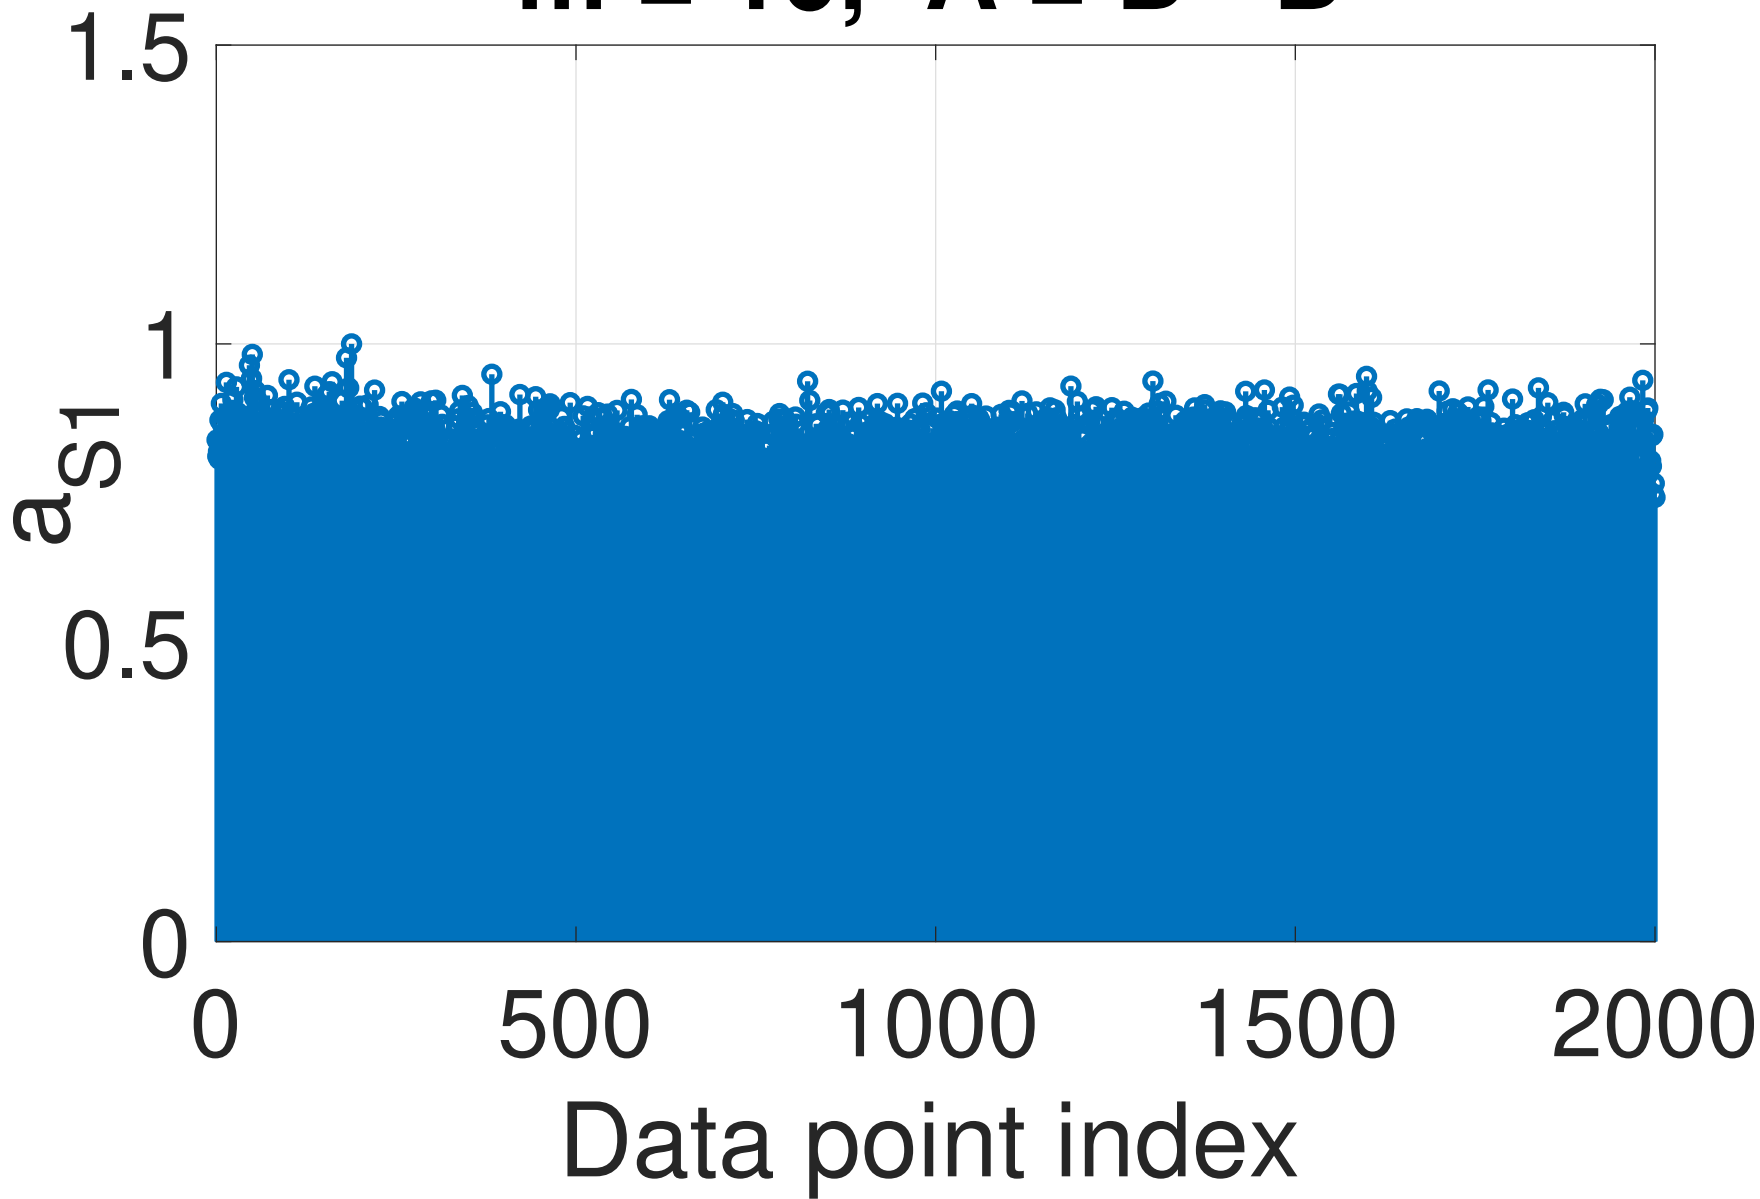

Supplement: supplementary_material [file attachment]

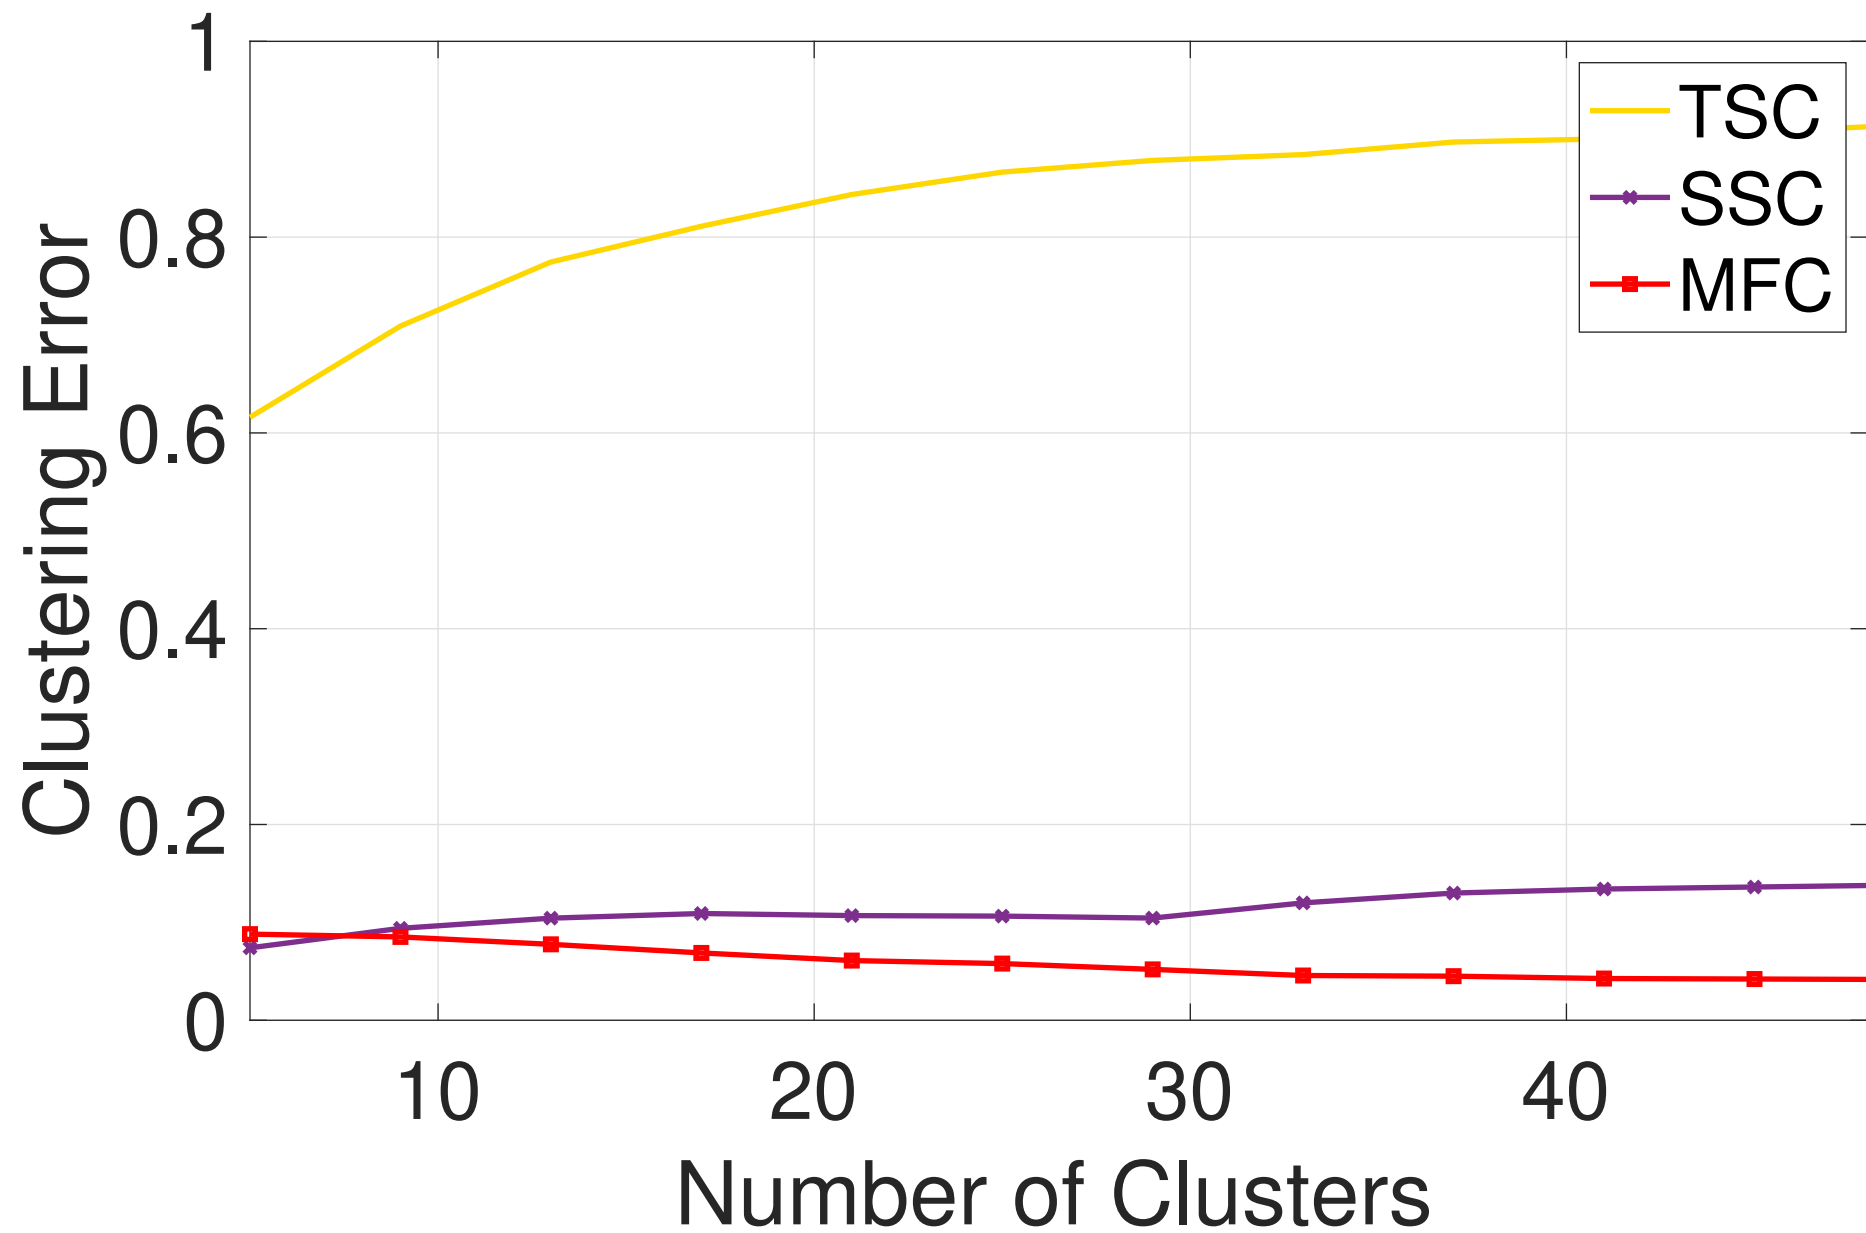

Supplement: supplementary_material [file attachment]

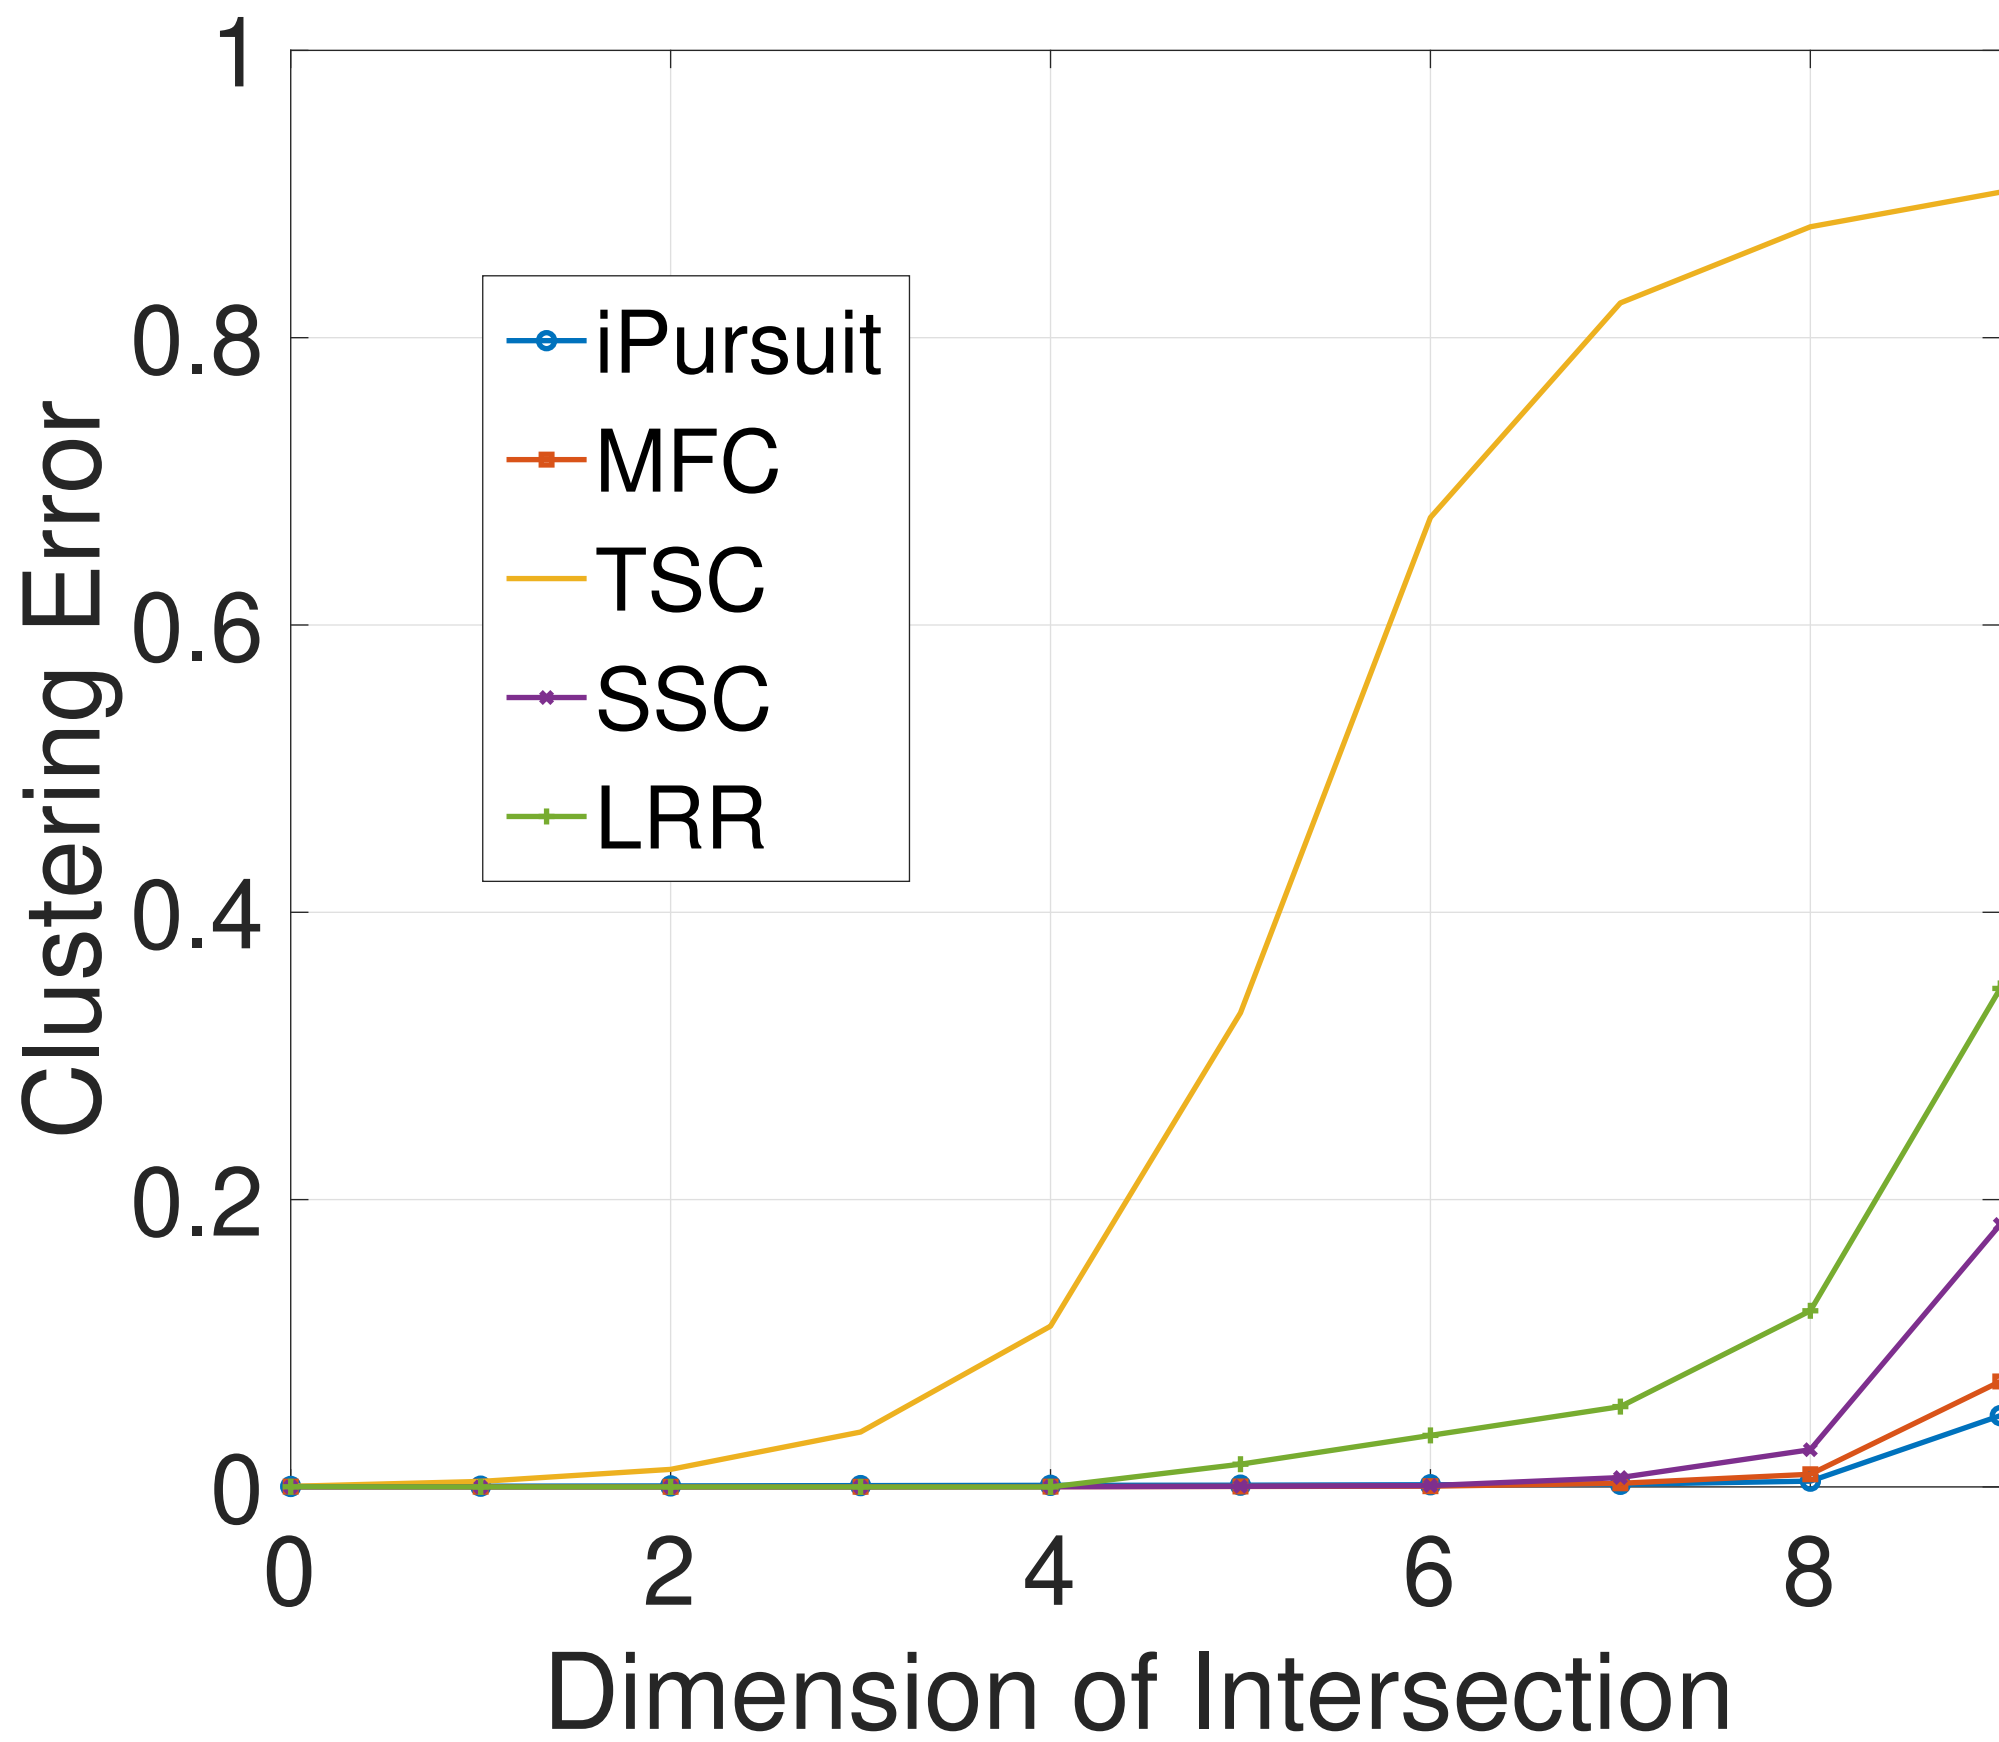

Supplement: supplementary_material [file attachment]

**$M_1 = 20$**

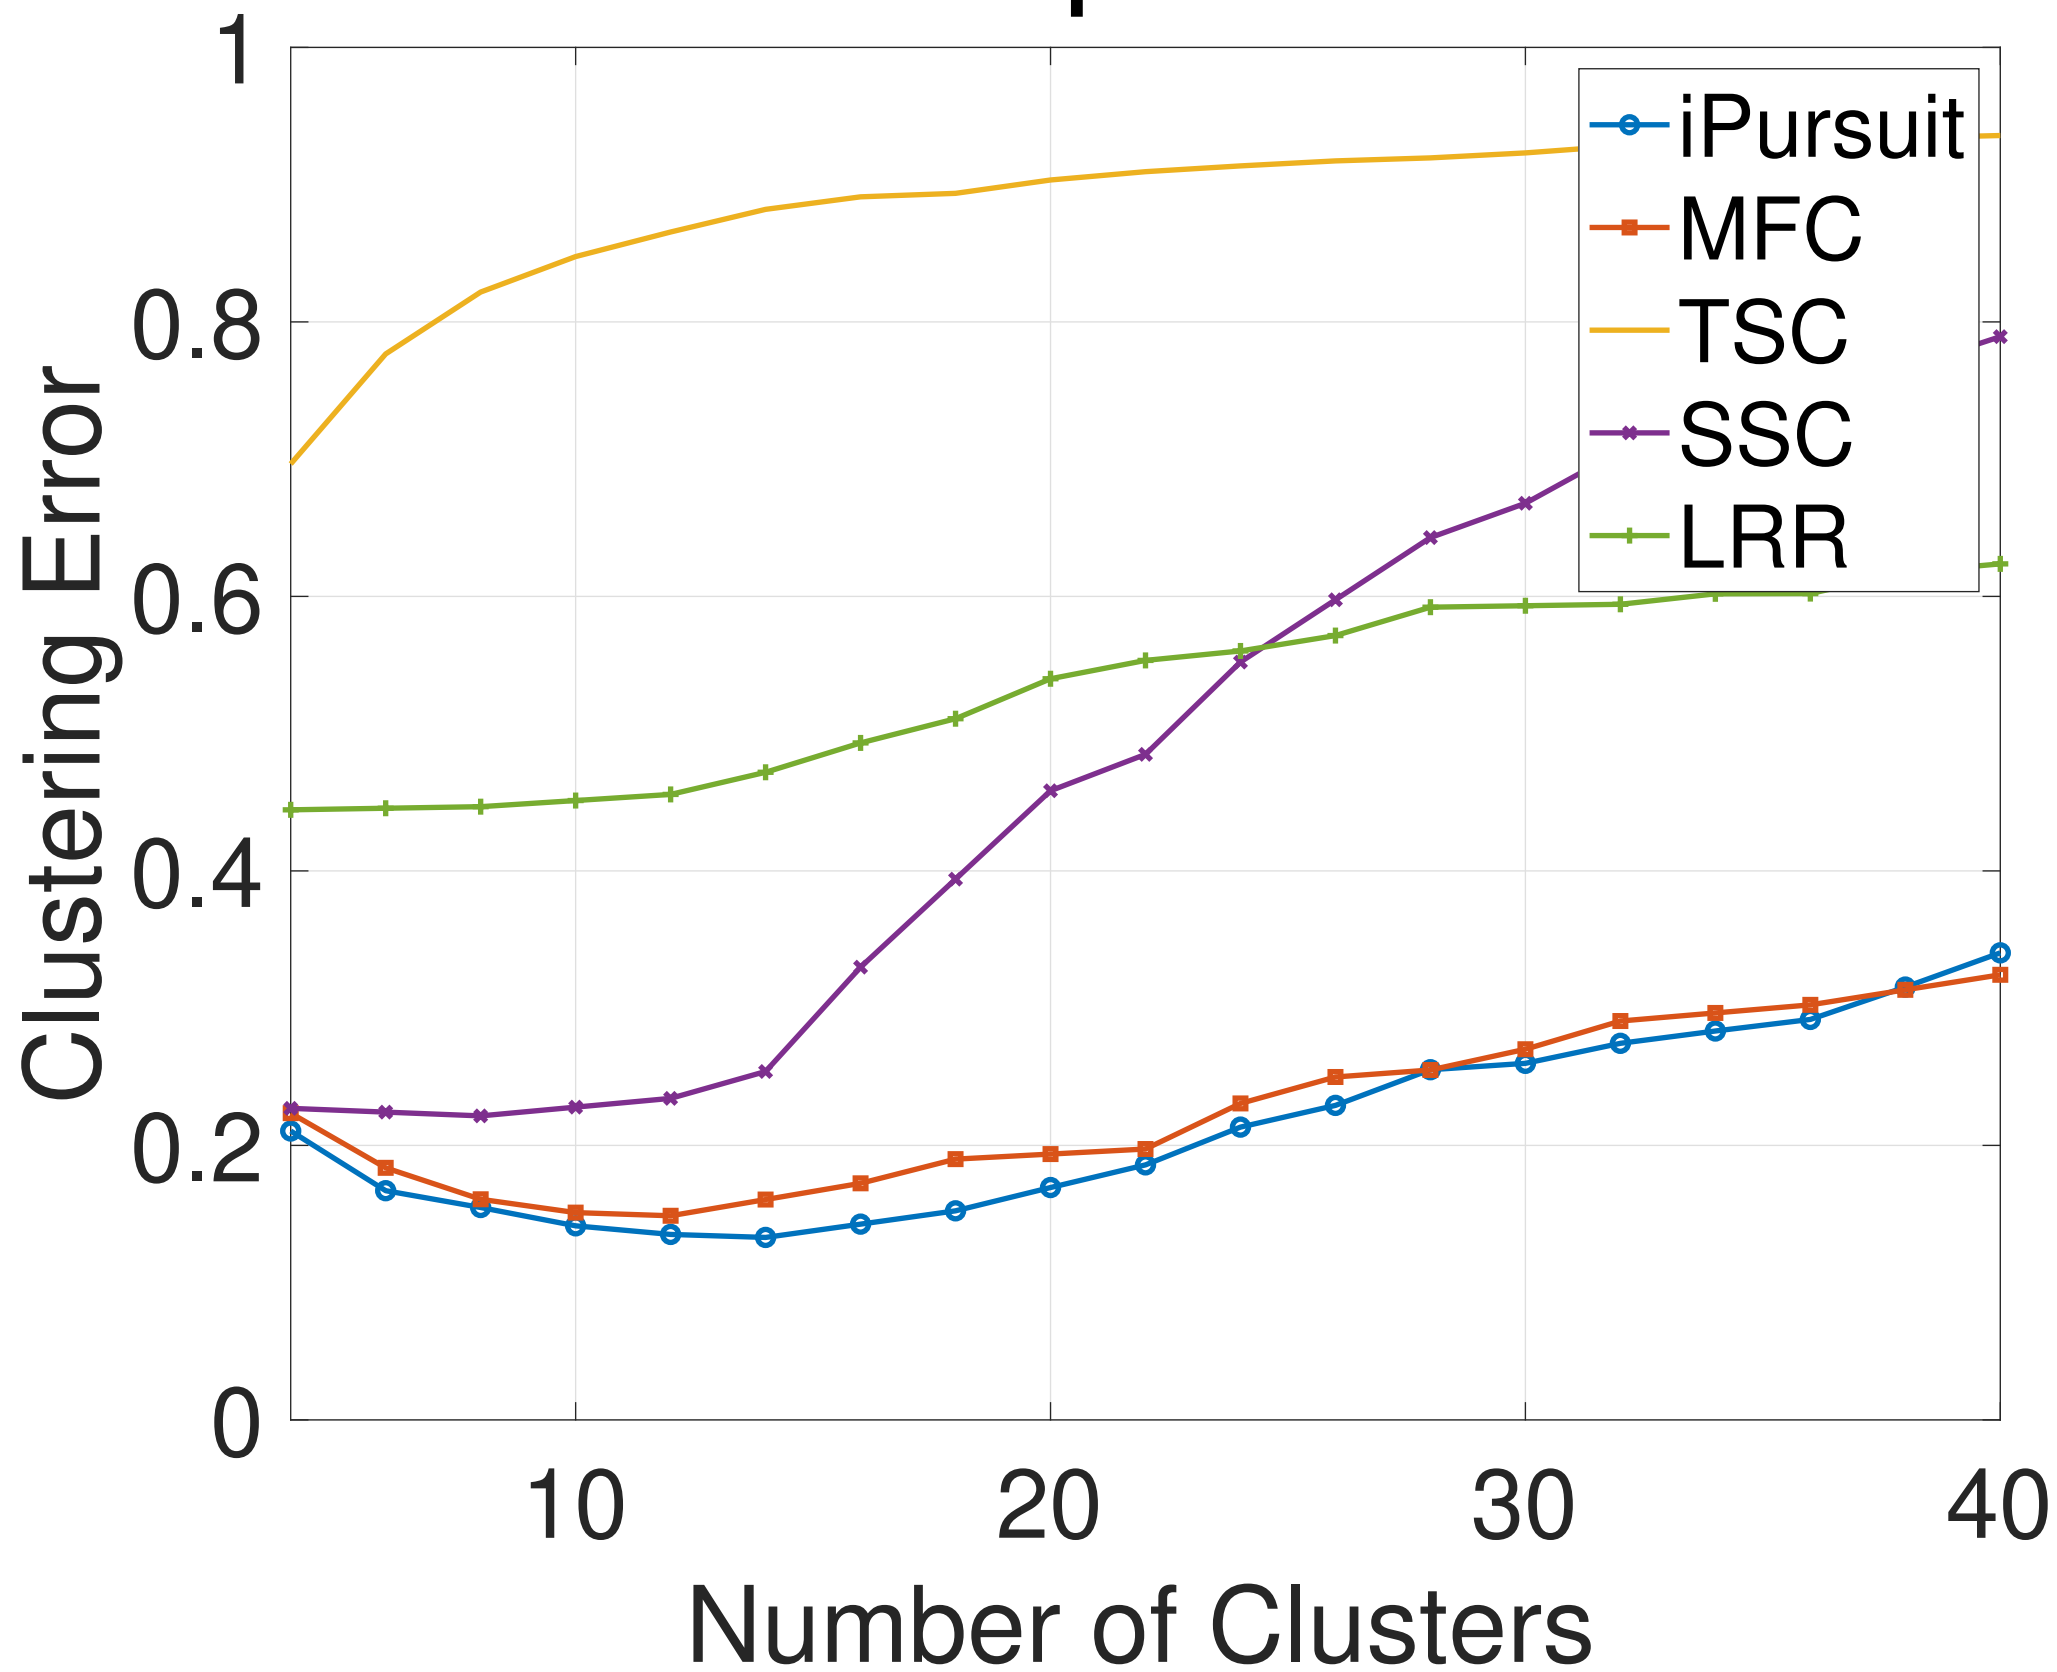

Supplement: supplementary_material [file attachment]
